# Supplementary material
Source: HighWire-hosted journal article supplement (https://bmjopensem.bmj.com/content/4/1/e000273)

# GRF

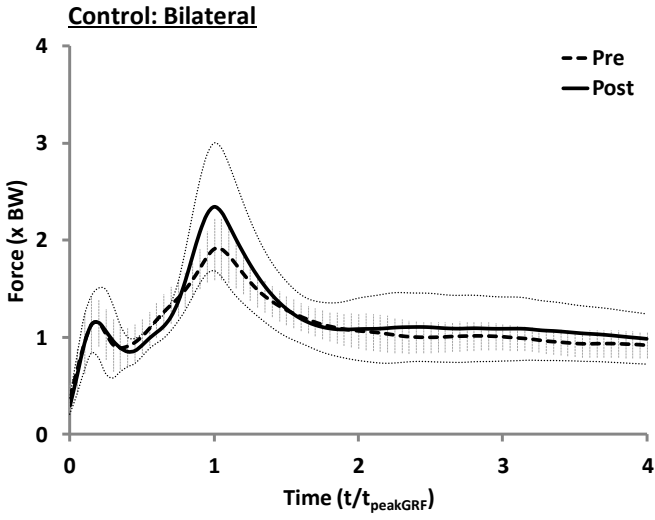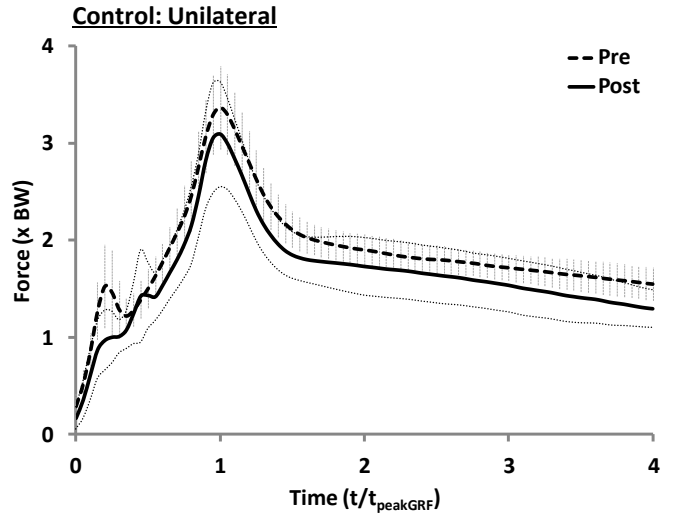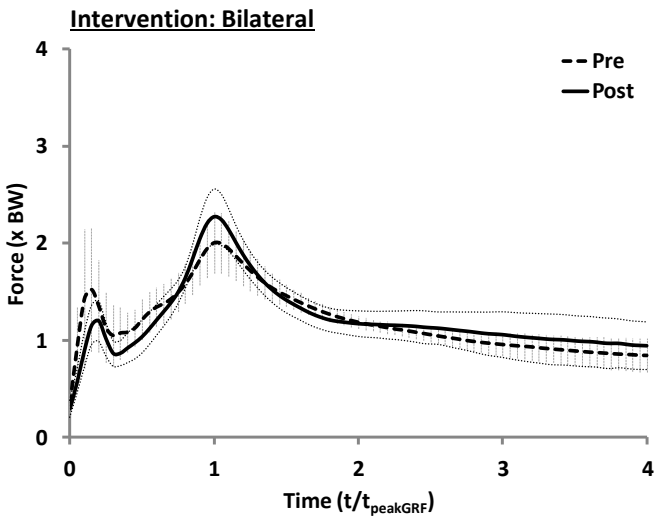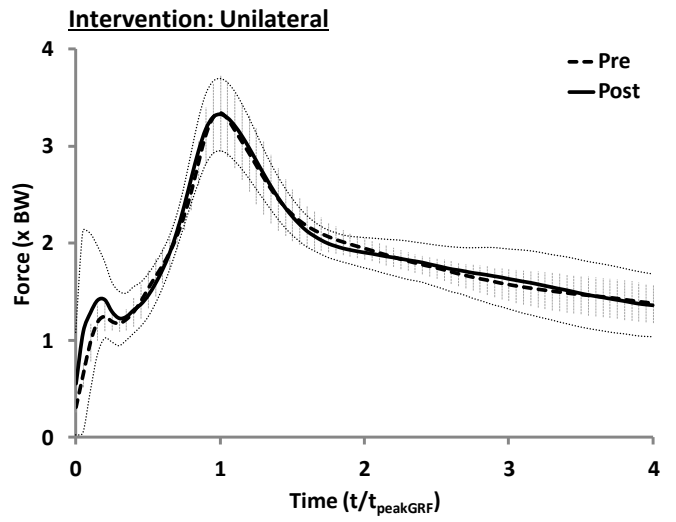

# Knee: Flexion/Extension

More positive values represent increasing knee flexion

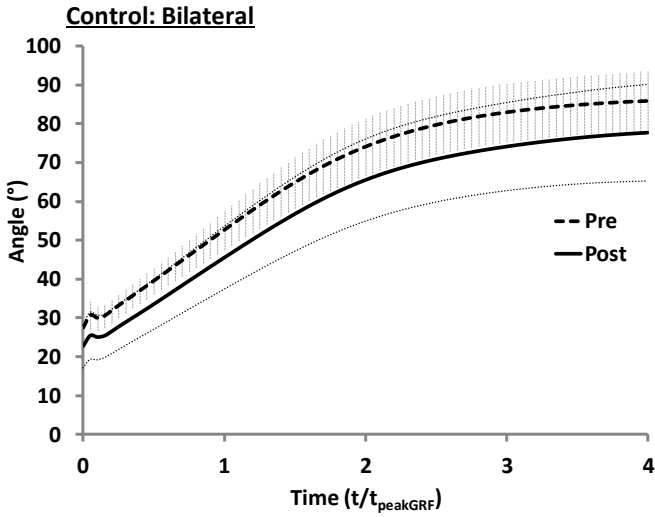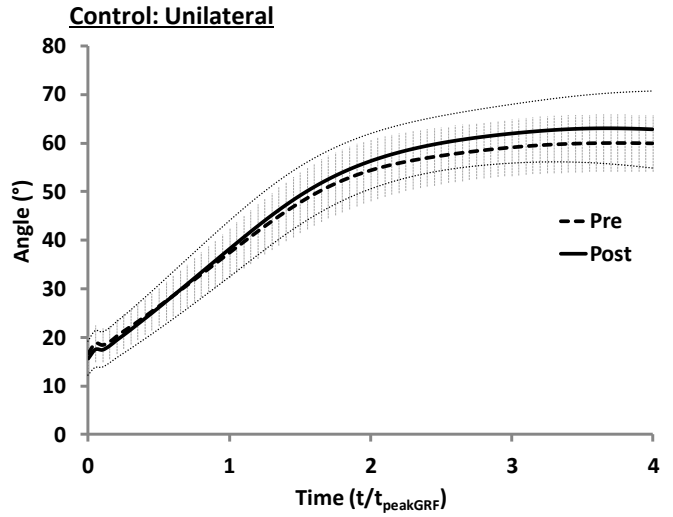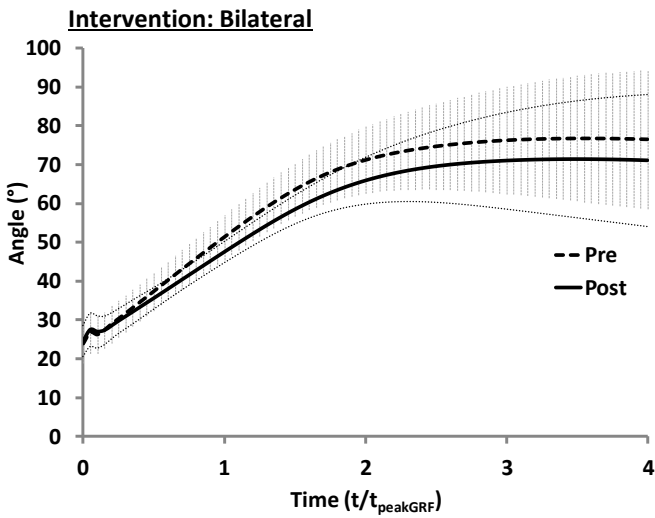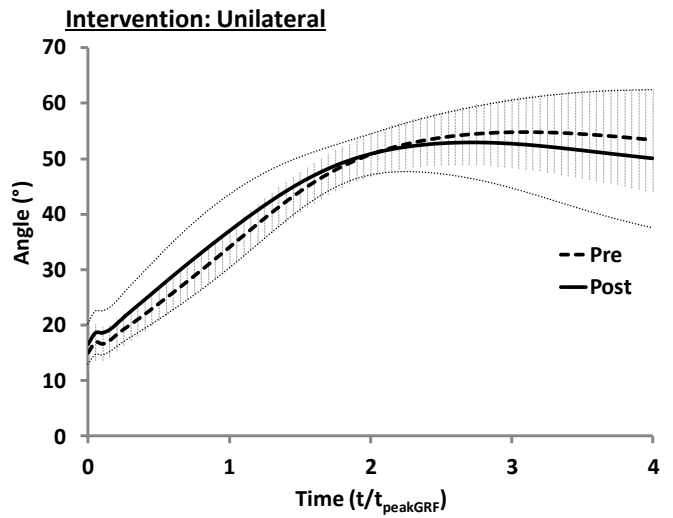

# Knee: Int/Ext Rotation

More positive values represent increasing tibial external rotation

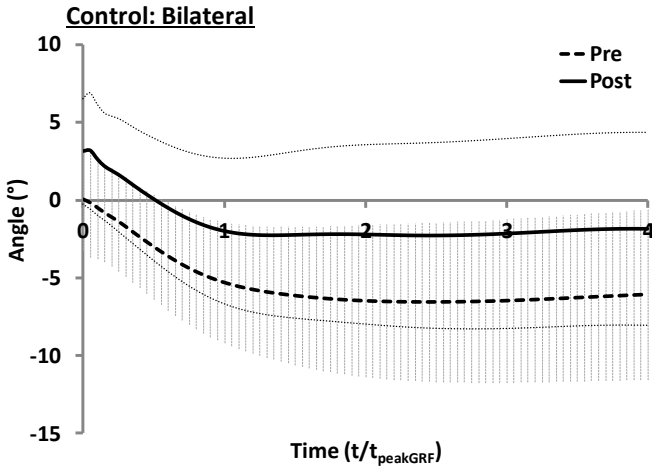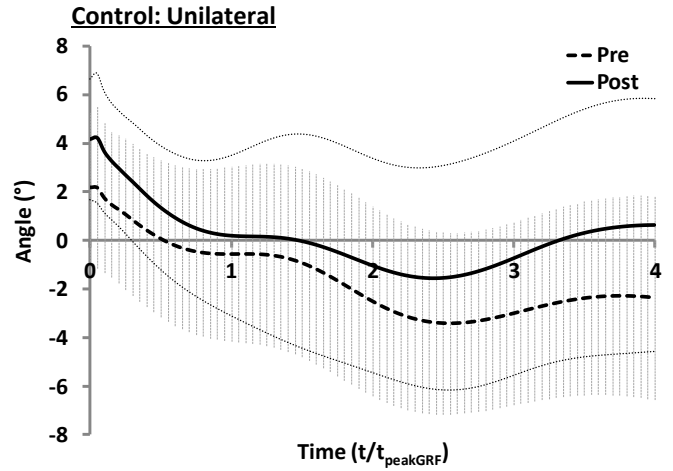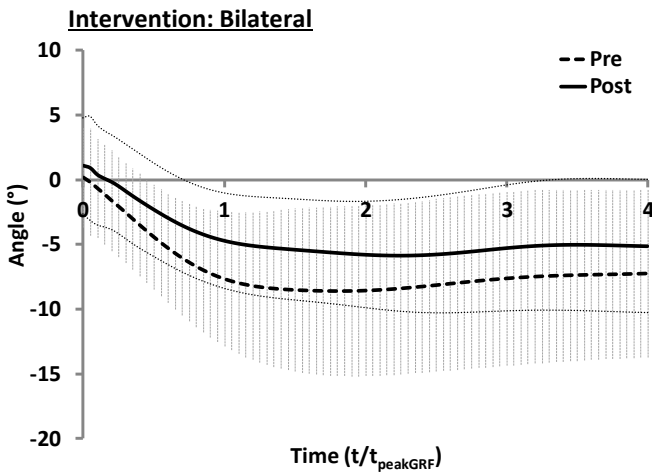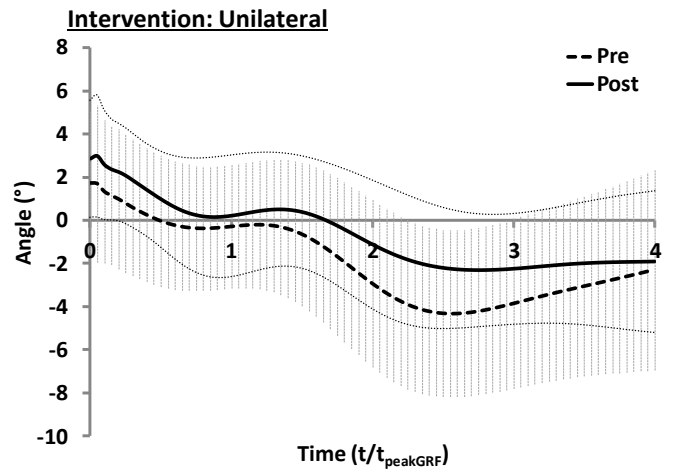

# Knee: Ab/Adduction

More positive values represent increasing knee valgus

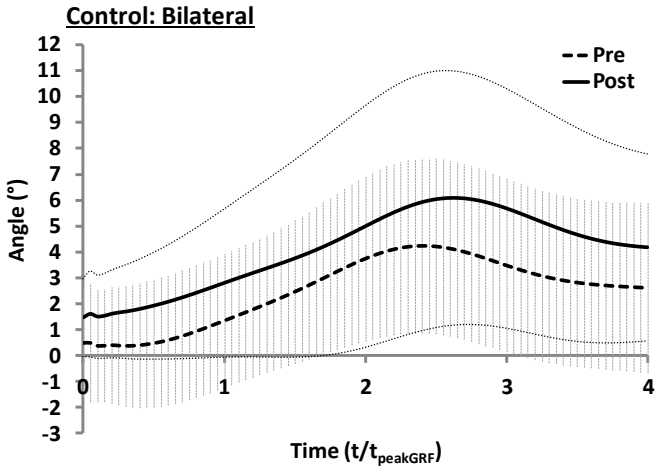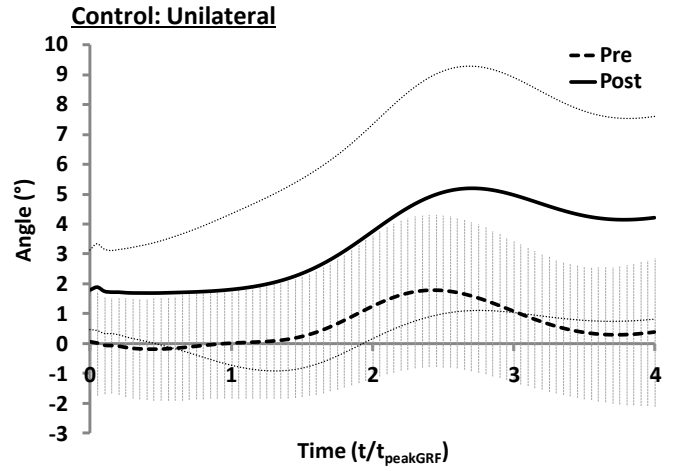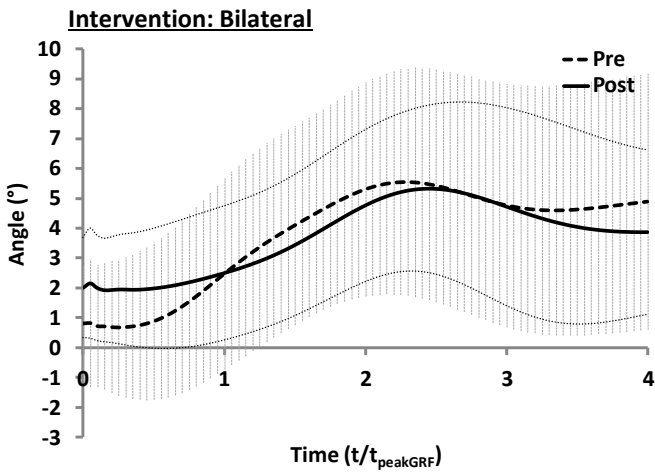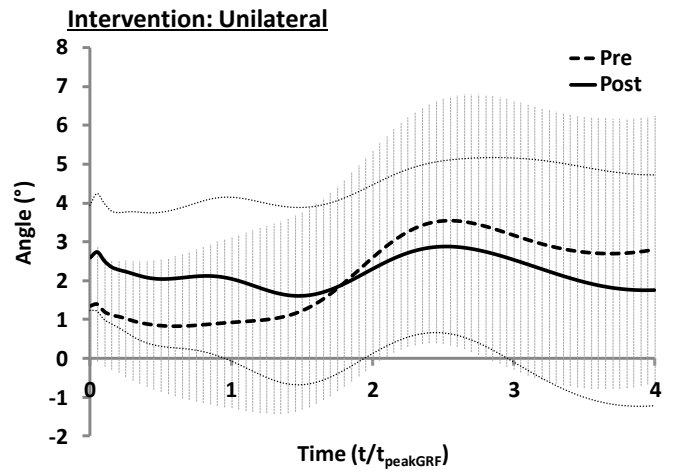

# Hip: Flexion/Extension

More positive values represent increasing hip extension

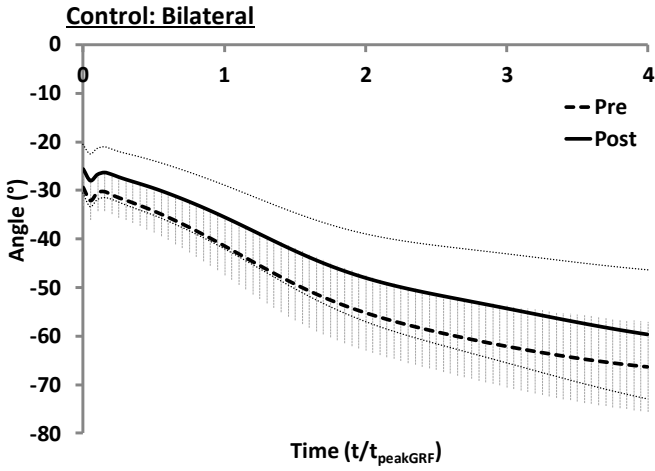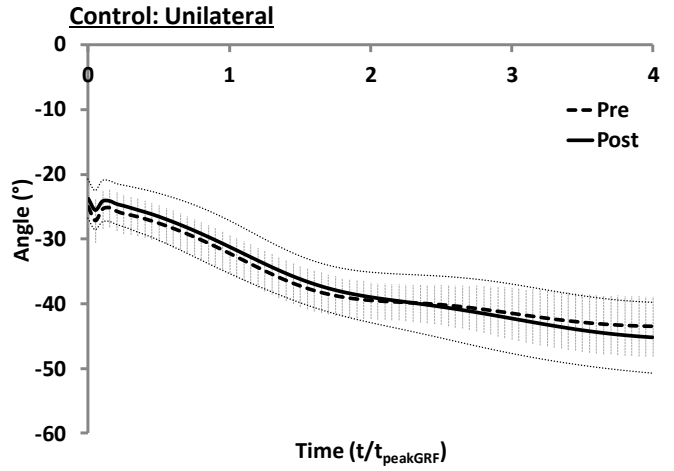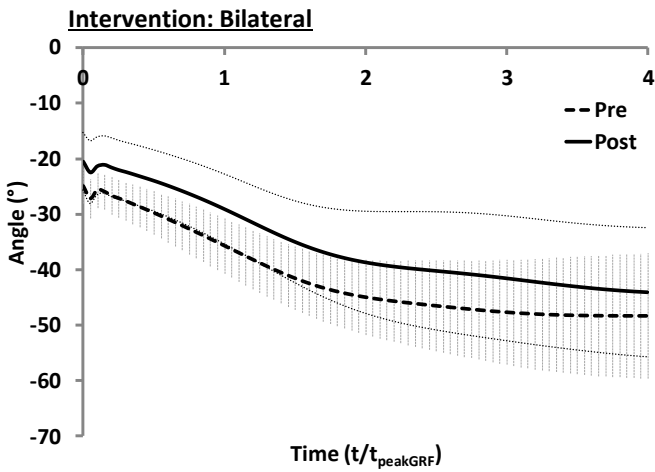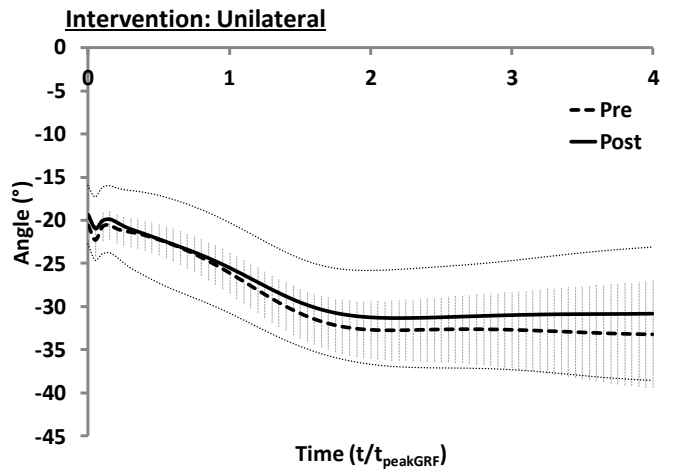

# Hip: Int/Ext Rotation

More positive values represent increasing femoral external rotation

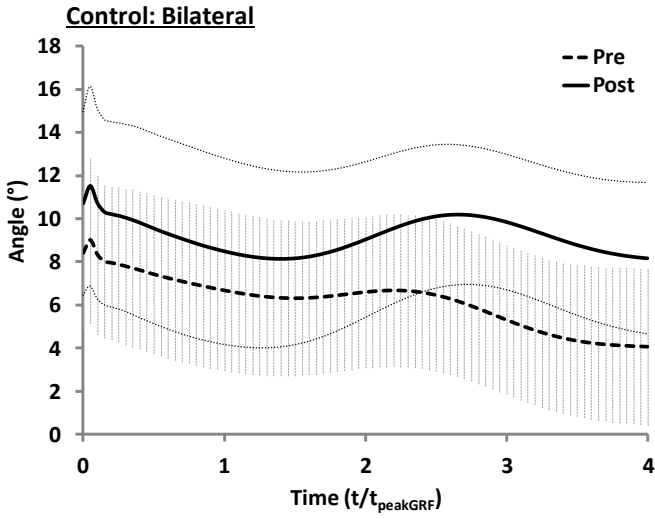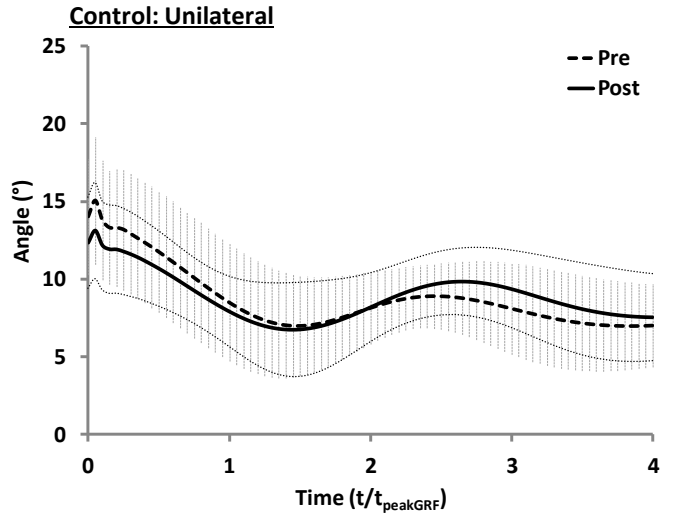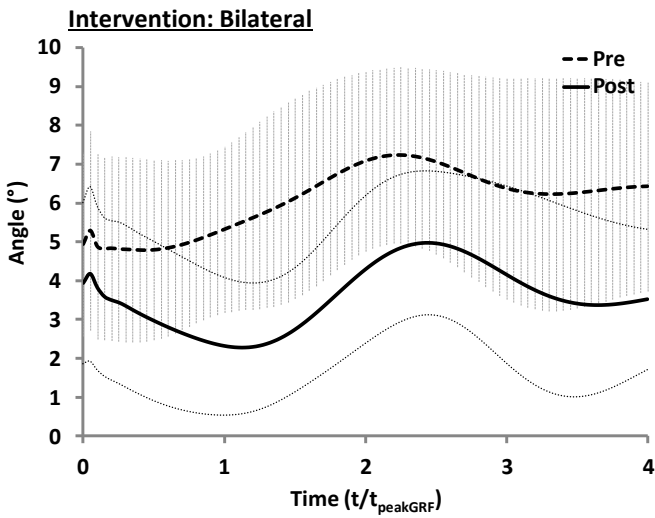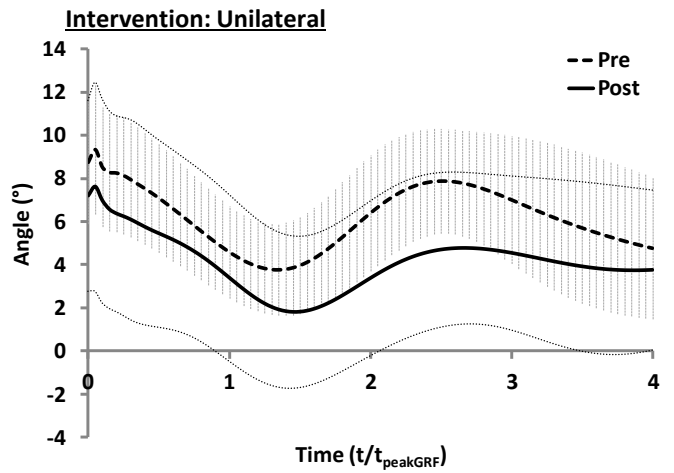

# Hip: Ab/Adduction

More positive values represent increasing femoral abduction

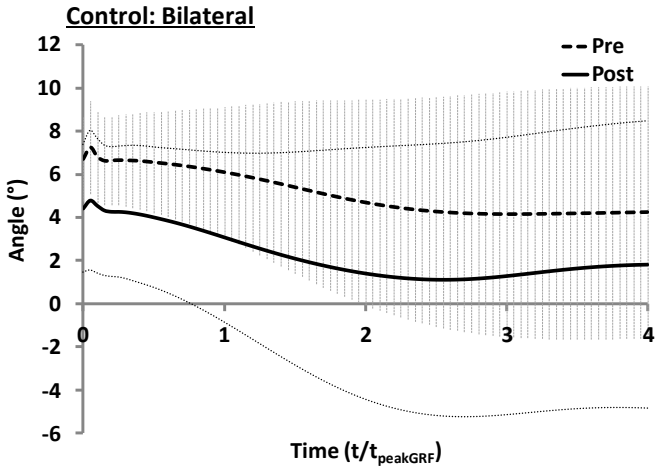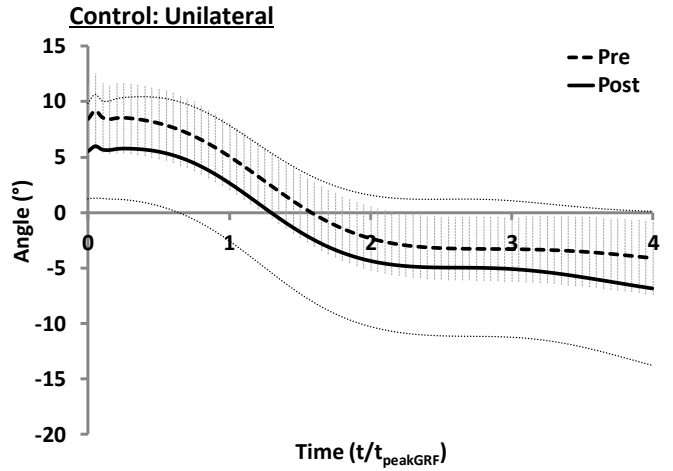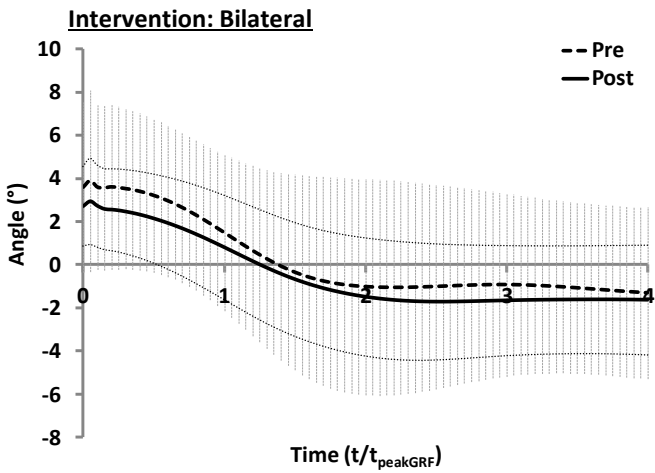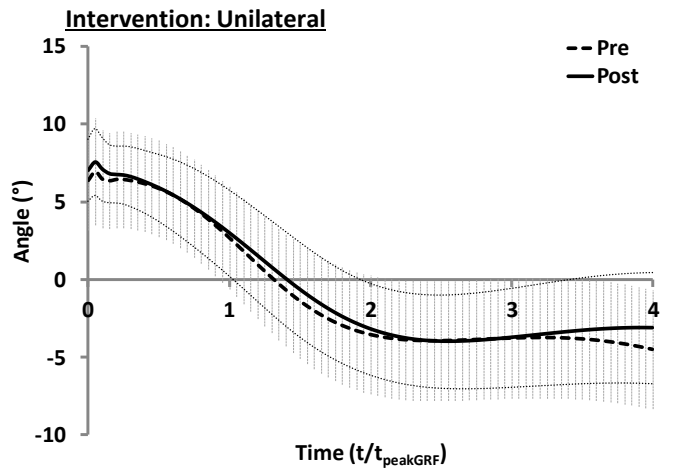

# Biarticular Hamstrings

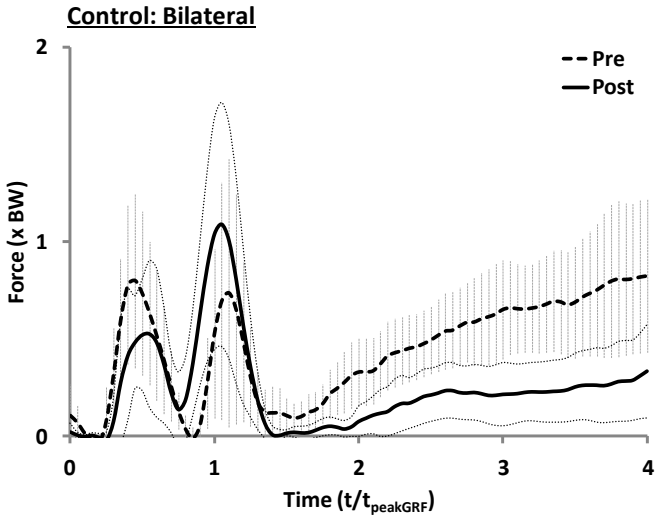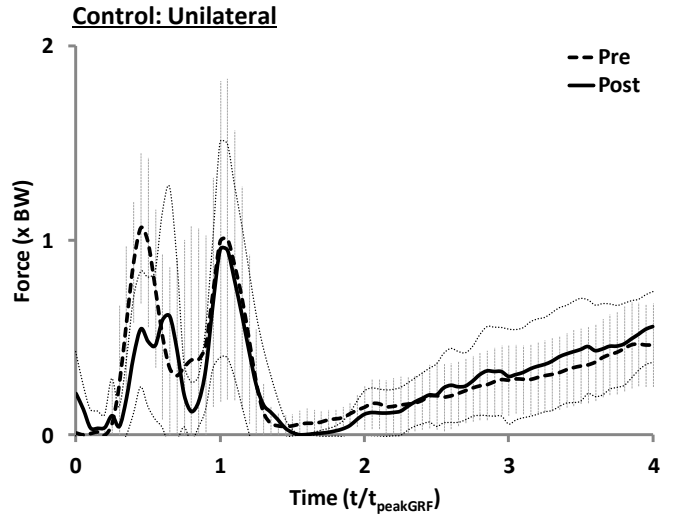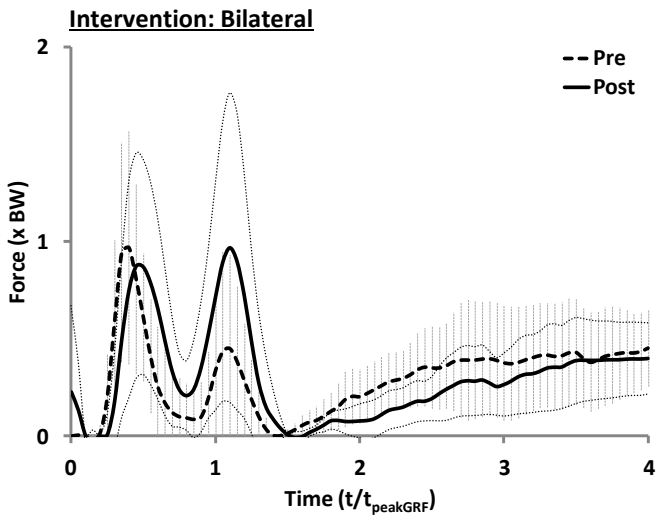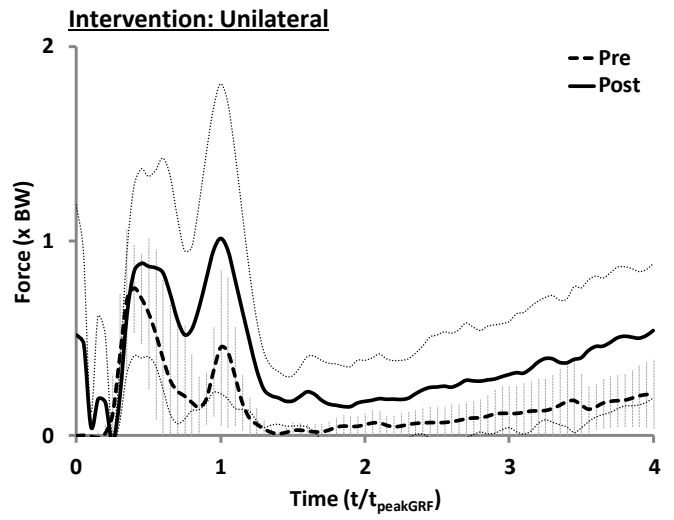



# Rectus Femoris

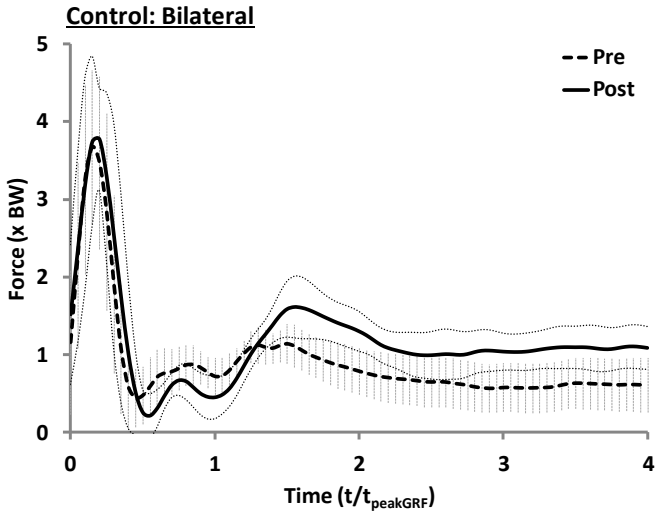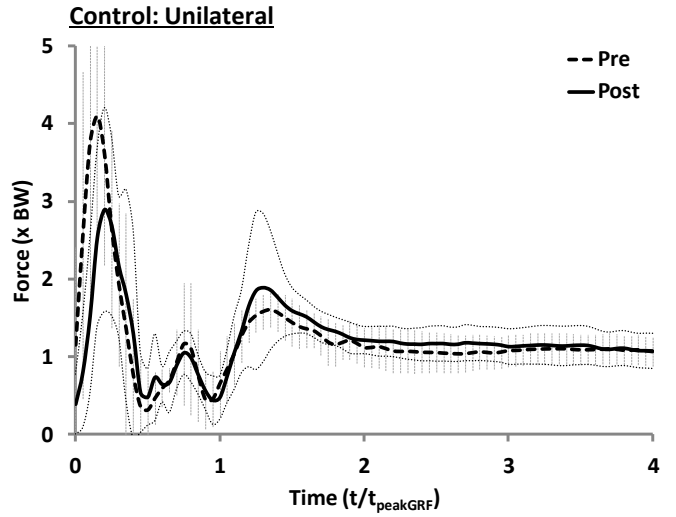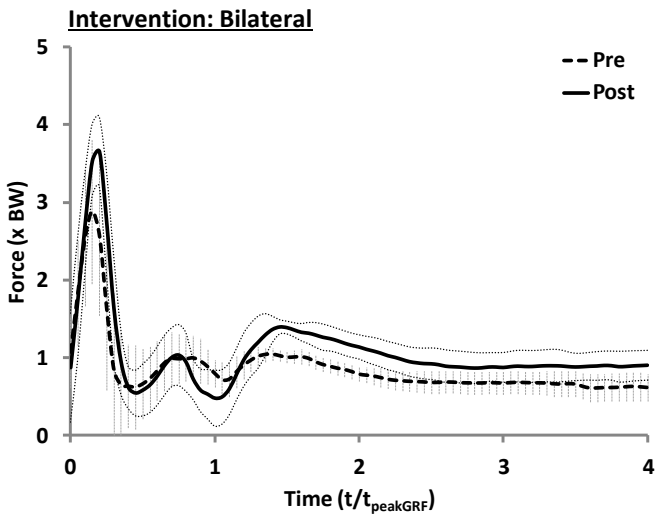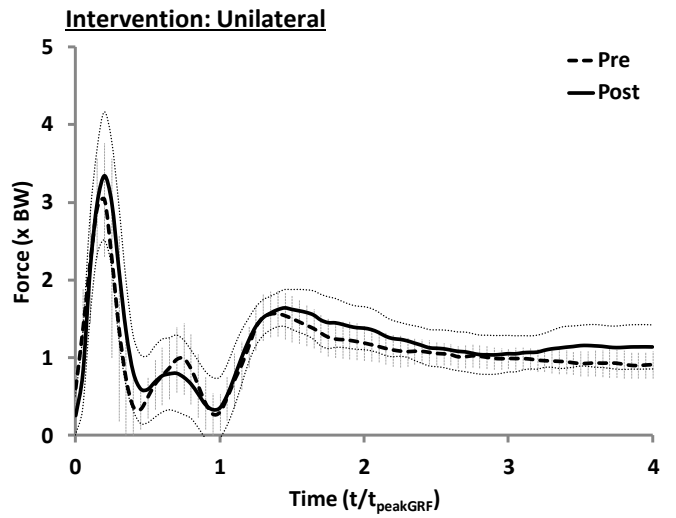

# Vastus

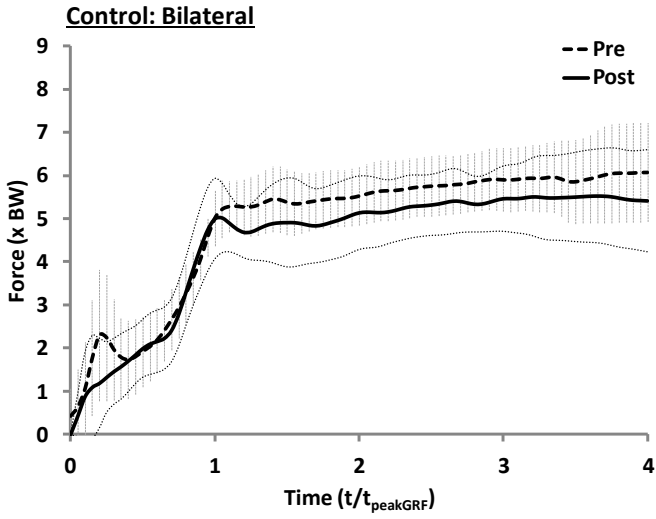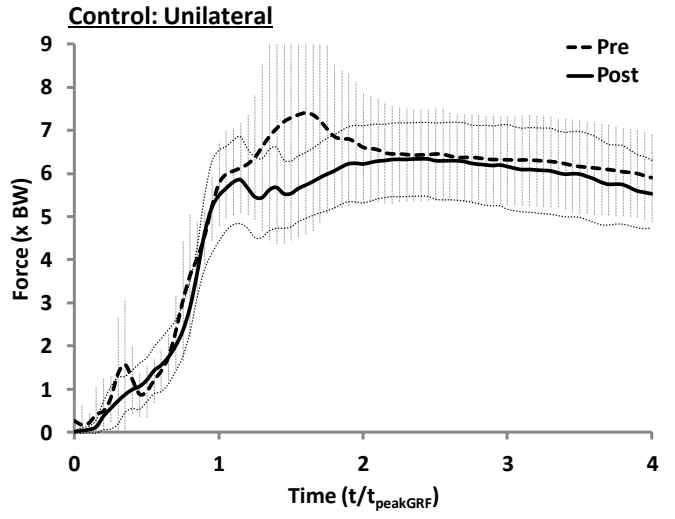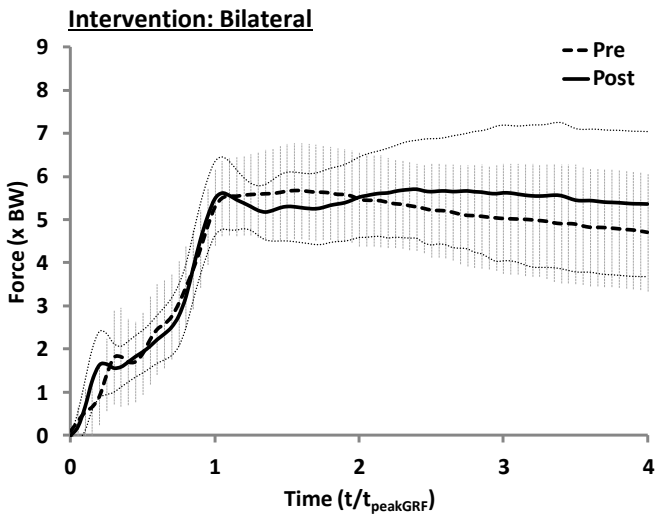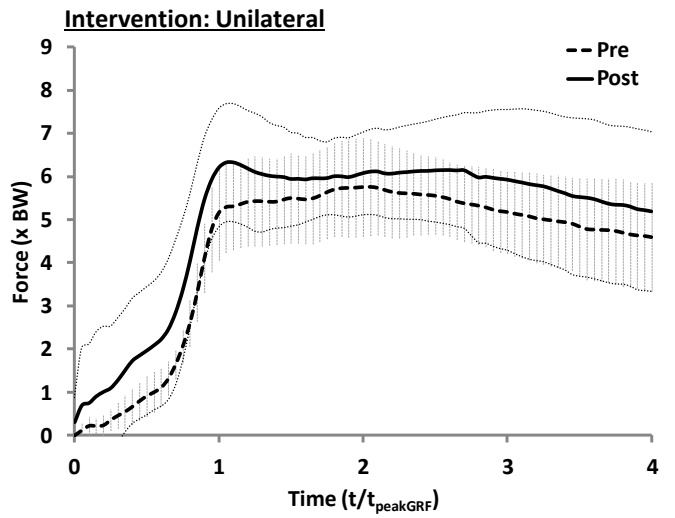

# Adductors

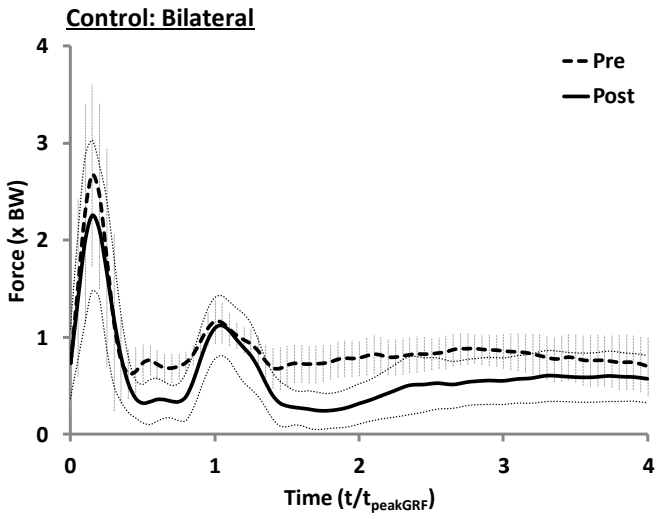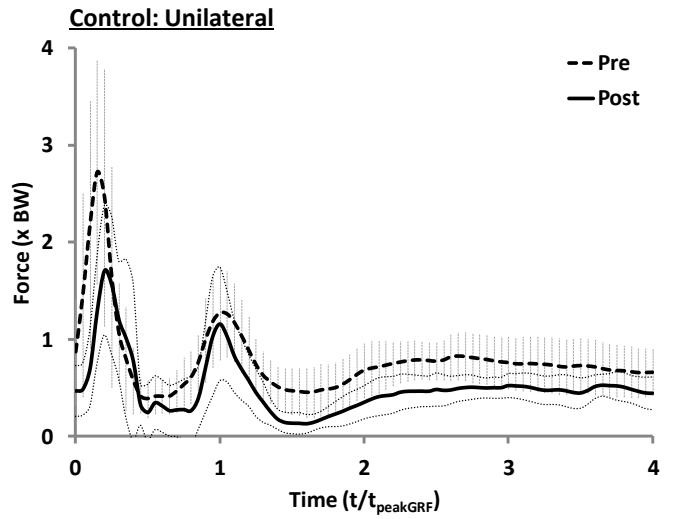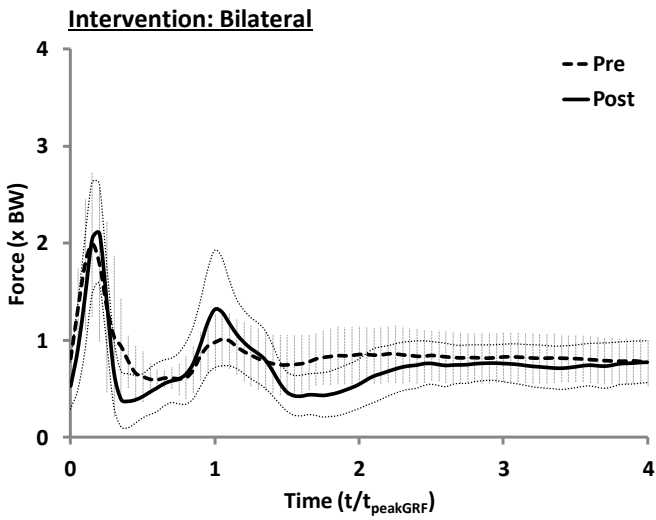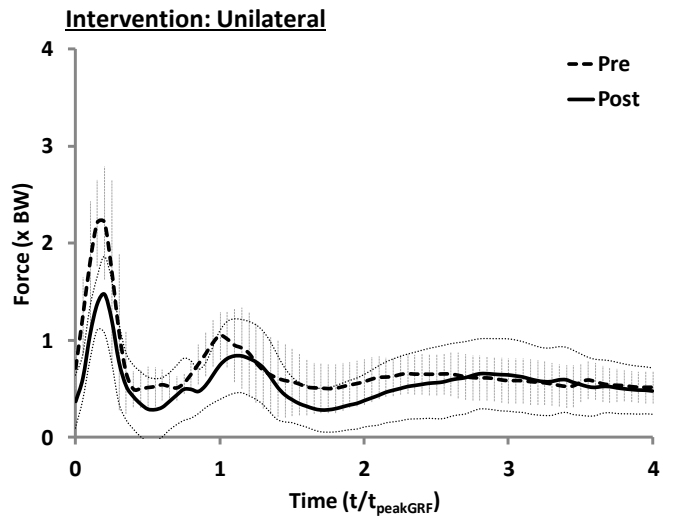

# Gastrocnemius

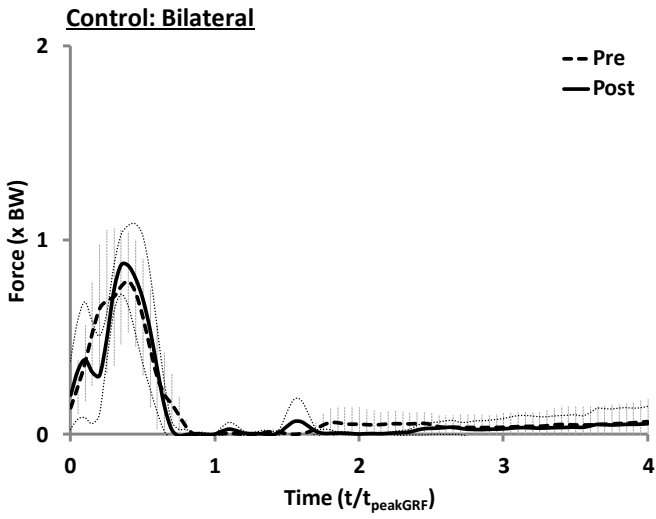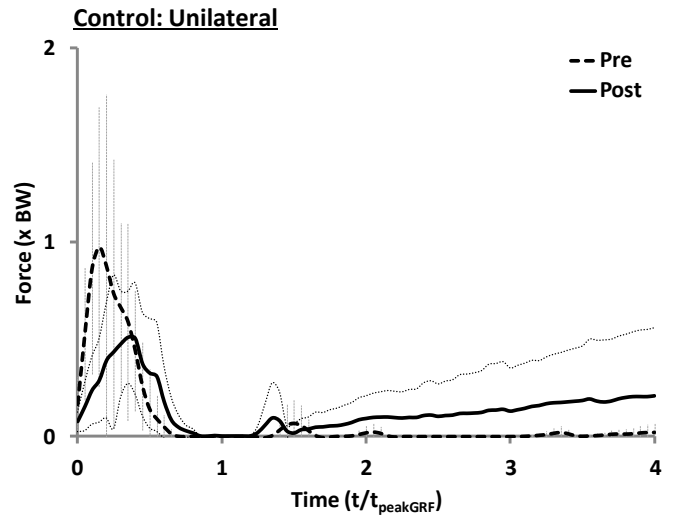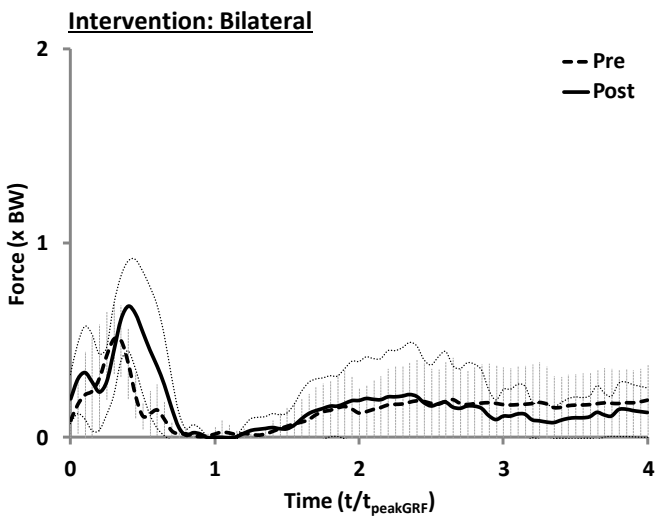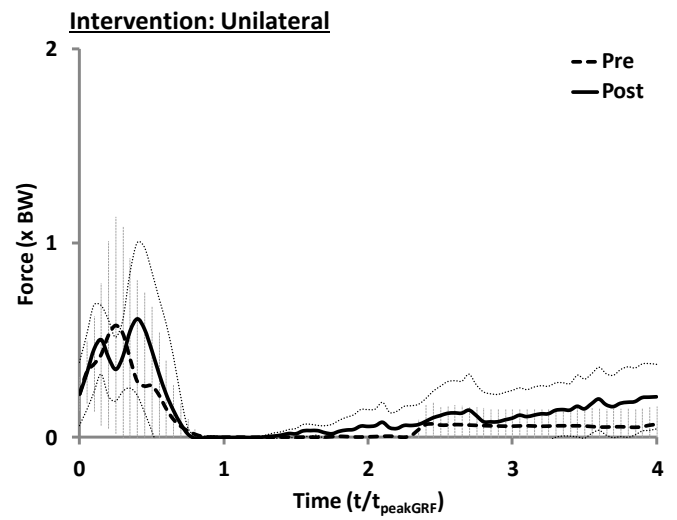

# Soleus

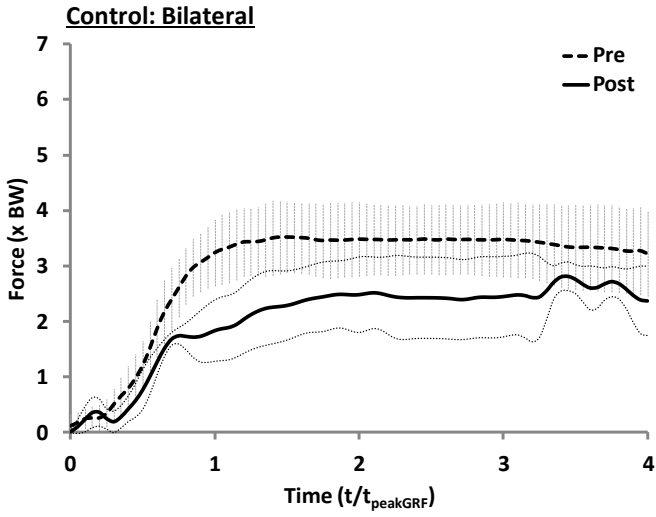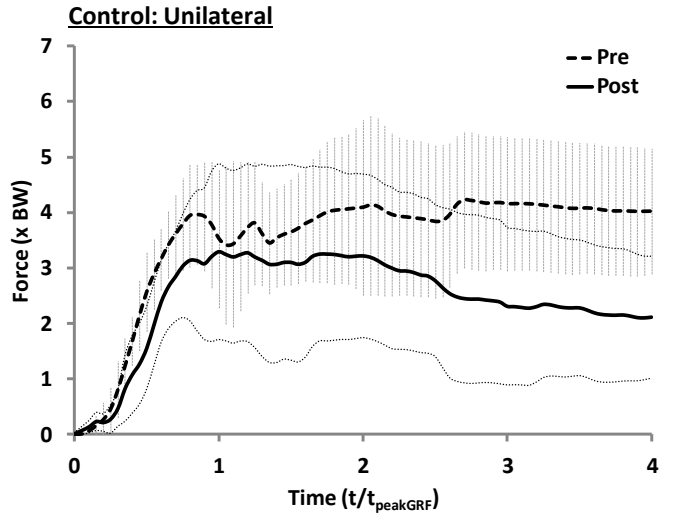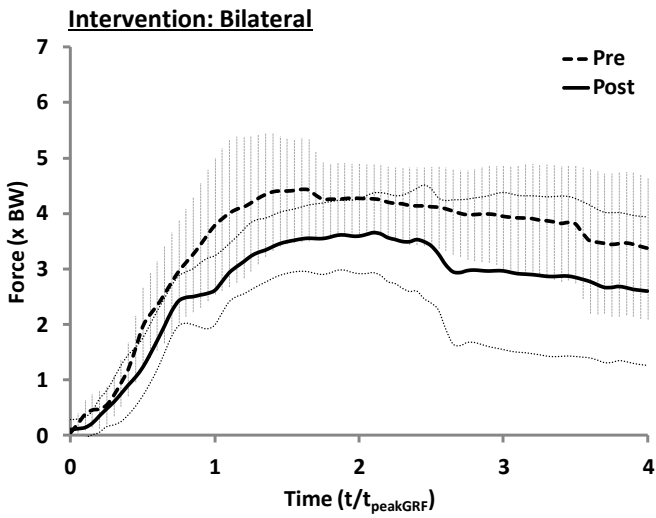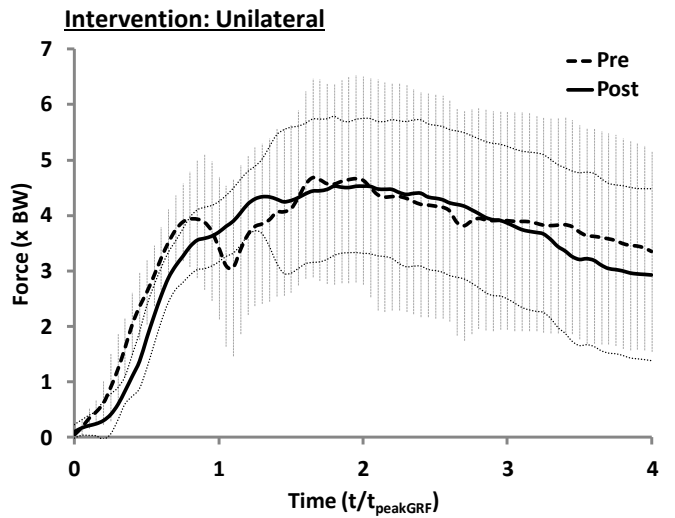

# Ankle Joint Reaction Forces

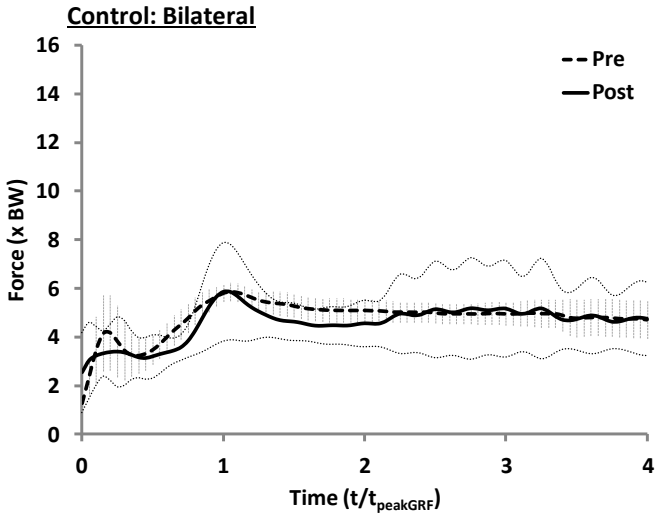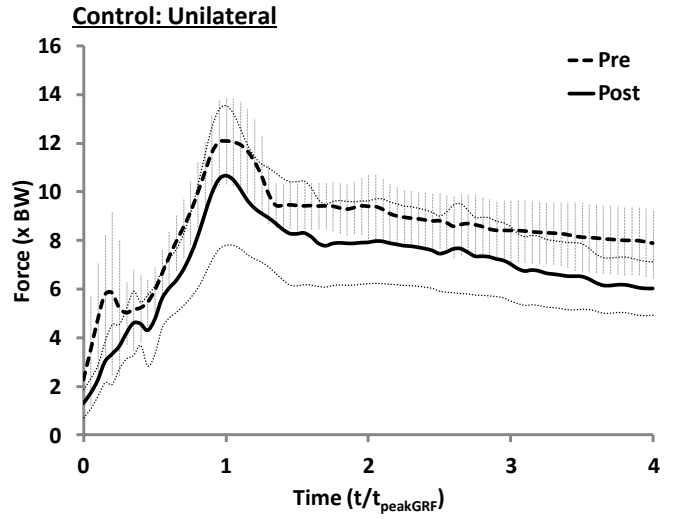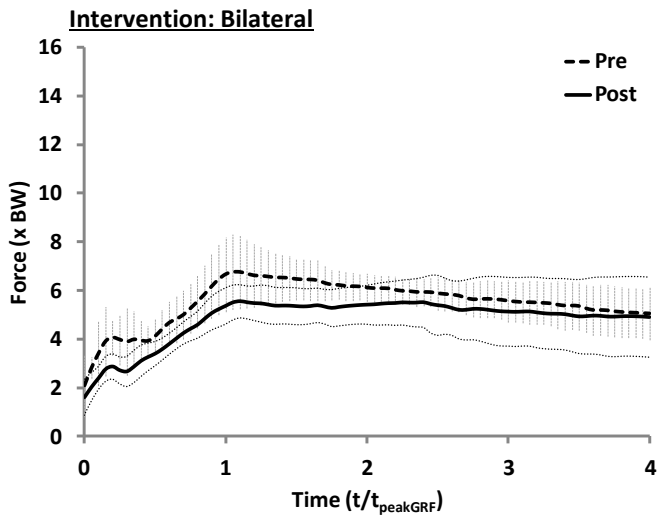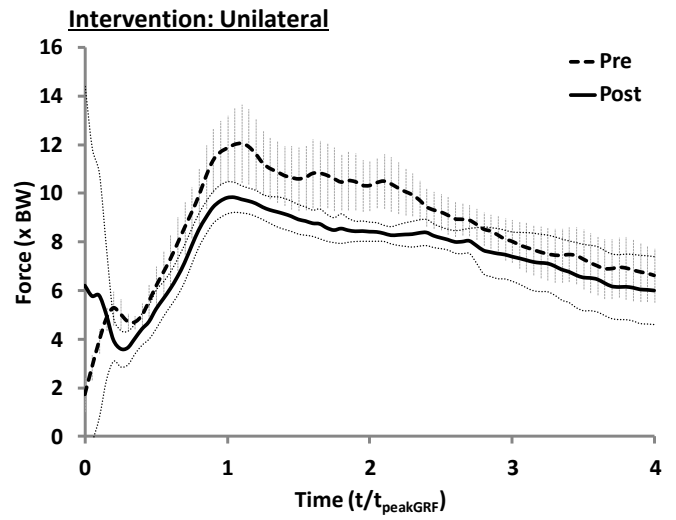

# Hip Joint Reaction Forces

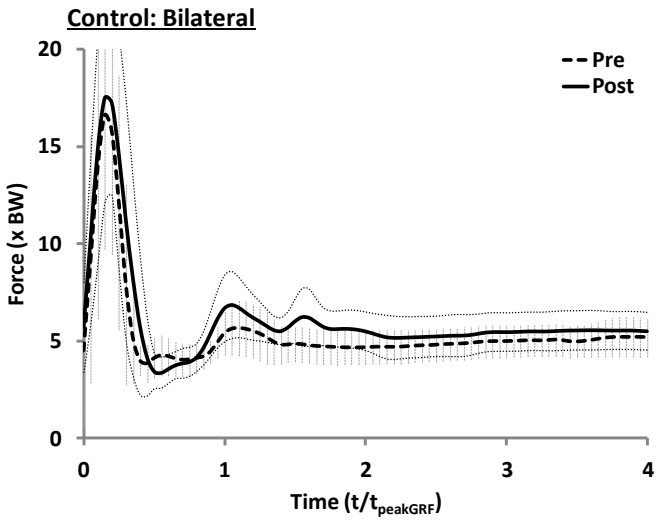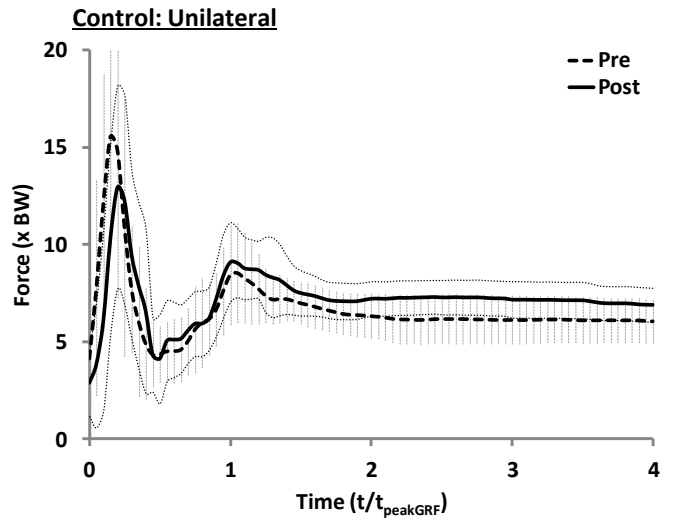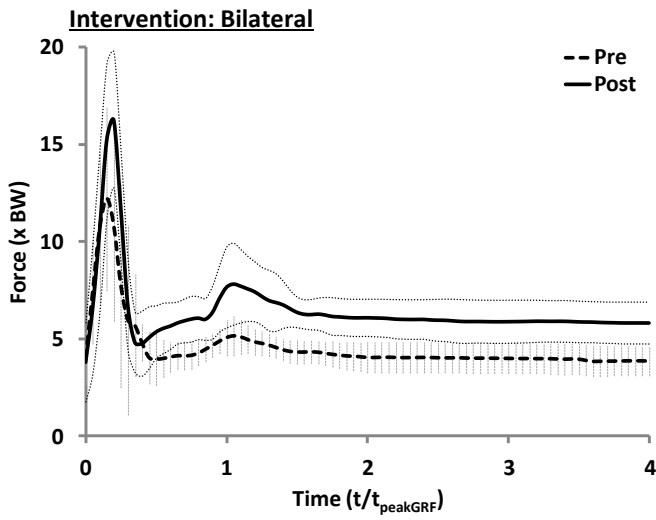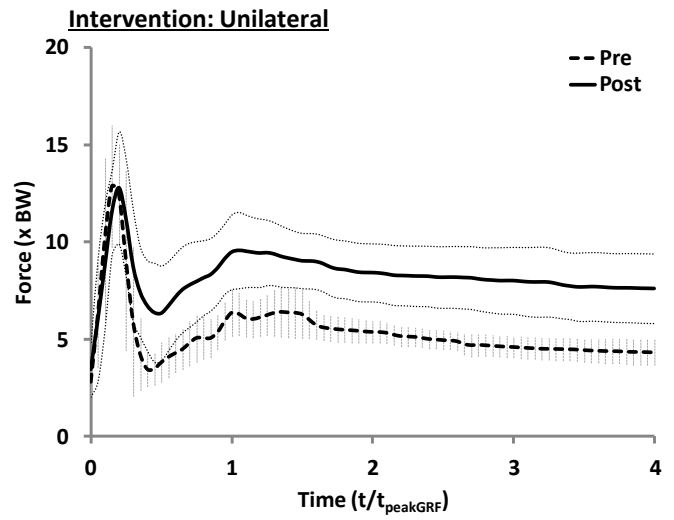

Supplement: inline-supplementary-material-2 [file inline-supplementary-material-2.pdf]
